# Supplementary material for: Design, Synthesis and Biological Evaluation of Neocryptolepine Derivatives as Potential Anti-Gastric Cancer Agents
Source: MDPI journal article supplement (doi:10.3390/ijms231911924), 2022-10-07
Supplement: s1 [file s1]

## Supporting Information

### Design, Synthesis and Biological Evaluation of Neocryptolepine Derivatives as Potential Anti-gastric Cancer Agents

Yunhao Ma <sup>1,†</sup>, Yanan Tian <sup>1,†</sup>, Zhongkun Zhou <sup>1</sup>, Shude Chen <sup>2</sup>, Kangjia Du <sup>1</sup>, Hao Zhang <sup>1</sup>, Xinrong Jiang <sup>1</sup>, Juan Lu <sup>1</sup>, Yuqing Niu <sup>1</sup>, Lixue Tu <sup>1</sup>, Jie Wang <sup>1</sup>, Huanxiang Liu <sup>1</sup>, Hongmei Zhu <sup>1</sup>, Peng Chen <sup>1,\*</sup>, Yingqian Liu <sup>1,\*</sup>

<sup>1</sup> School of Pharmacy, Lanzhou University, Lanzhou 730000, China

<sup>2</sup> The Second Clinical Medical College, Lanzhou University, Lanzhou 730000, China

\* Correspondence: chenpeng@lzu.edu.cn (P.C.); yqliu@lzu.edu.cn (Y.L.); Tel./Fax: +86-931-8915686 (P.C. & Y.L.)

<sup>†</sup> These authors contributed equally to this work.

## **Table and Figure Caption**

**Table S1.** The molecular docking scoring of compound **C5** and proteins

**Table S2.** The molecular docking scoring of compound **C8** and proteins

**Figure S1.**  $^1\text{H}$  NMR spectra of compound **C5**

**Figure S2.**  $^{13}\text{C}$  NMR spectra of compound **C5**

**Figure S3.** Mass spectrometry of compound **C5**

**Figure S4.**  $^1\text{H}$  NMR spectra of compound **C8**

**Figure S5.**  $^{13}\text{C}$  NMR spectra of compound **C8**

**Figure S6.** Mass spectrometry of compound **C8**

**Figure S7.** Purity test of compound **A1** by HPLC

**Figure S8.** Purity test of compound **A2** by HPLC

**Figure S9.** Purity test of compound **A3** by HPLC

**Figure S10.** Purity test of compound **A4** by HPLC

**Figure S11.** Purity test of compound **A5** by HPLC

**Figure S12.** Purity test of compound **A6** by HPLC

**Figure S13.** Purity test of compound **A7** by HPLC

**Figure S14.** Purity test of compound **A8** by HPLC

**Figure S15.** Purity test of compound **A9** by HPLC

**Figure S16.** Purity test of compound **A10** by HPLC

**Figure S17.** Purity test of compound **B1** by HPLC

**Figure S18.** Purity test of compound **B2** by HPLC

**Figure S19.** Purity test of compound **B3** by HPLC

**Figure S20.** Purity test of compound **B4** by HPLC

**Figure S21.** Purity test of compound **B5** by HPLC

**Figure S22.** Purity test of compound **B6** by HPLC

**Figure S23.** Purity test of compound **B7** by HPLC

**Figure S24.** Purity test of compound **B8** by HPLC

**Figure S25.** Purity test of compound **B9** by HPLC

**Figure S26.** Purity test of compound **C1** by HPLC

**Figure S27.** Purity test of compound **C2** by HPLC

**Figure S28.** Purity test of compound **C3** by HPLC

**Figure S29.** Purity test of compound **C4** by HPLC

**Figure S30.** Purity test of compound **C5** by HPLC

**Figure S31.** Purity test of compound **C6** by HPLC

**Figure S32.** Purity test of compound **C7** by HPLC

**Figure S33.** Purity test of compound **C8** by HPLC

**Figure S34.** Purity test of compound **C9** by HPLC

**Figure S35.** Purity test of compound **C10** by HPLC

**Figure S36.** Purity test of compound **D1** by HPLC

**Figure S37.** Purity test of compound **D2** by HPLC

**Figure S38.** Purity test of compound **D3** by HPLC

**Figure S39.** Purity test of compound **D4** by HPLC

**Figure S40.** Purity test of compound **D5** by HPLC

**Figure S41.** Purity test of compound **D6** by HPLC

**Figure S42.** Purity test of compound **E1** by HPLC

Table S1 The molecular docking scoring of compound **C5** and proteins

| Number | Target        | PDB ID | Resolution | Organisms           | Docking score |
|--------|---------------|--------|------------|---------------------|---------------|
| 1      | AKT           | 6hhf   | 2.90       | <i>Homo sapiens</i> | -8.529        |
| 2      | Cyclin E1     | 5l2w   | 2.80       | <i>Homo sapiens</i> | -8.171        |
| 3      | PI3K          | 6gvf   | 2.50       | <i>Homo sapiens</i> | -8.077        |
| 4      | CDK2          | 5nev   | 2.97       | <i>Homo sapiens</i> | -7.744        |
| 5      | Cyclin A      | 6gue   | 1.99       | <i>Homo sapiens</i> | -7.535        |
| 6      | CDK6          | 3nux   | 2.70       | <i>Homo sapiens</i> | -7.497        |
| 7      | BCI-xl        | 7lh7   | 1.41       | <i>Homo sapiens</i> | -7.377        |
| 8      | MEK           | 5eym   | 2.70       | <i>Homo sapiens</i> | -7.357        |
| 9      | Raf           | 5fd2   | 2.89       | <i>Homo sapiens</i> | -7.322        |
| 10     | JNK           | 4y5h   | 2.06       | <i>Homo sapiens</i> | -7.254        |
| 11     | JAK           | 5tq6   | 2.06       | <i>Homo sapiens</i> | -7.129        |
| 12     | PARP          | 6bhv   | 2.30       | <i>Homo sapiens</i> | -7.011        |
| 13     | mTOR          | 4jt6   | 3.60       | <i>Homo sapiens</i> | -6.81         |
| 14     | GSK-3 $\beta$ | 1pyx   | 2.40       | <i>Homo sapiens</i> | -6.392        |
| 15     | Cyclin D1     | 5vzu   | 2.70       | <i>Homo sapiens</i> | -6.138        |
| 16     | CDK7          | 1ua2   | 3.02       | <i>Homo sapiens</i> | -5.656        |
| 17     | Bax           | 4zie   | 1.80       | <i>Homo sapiens</i> | -5.403        |
| 18     | MAPK          | 6tca   | 3.70       | <i>Homo sapiens</i> | -5.279        |
| 19     | Bad           | 4ieh   | 2.10       | <i>Homo sapiens</i> | -5.101        |
| 20     | Bcl-2         | 6qgg   | 1.50       | <i>Homo sapiens</i> | -5.035        |
| 21     | Caspase-3     | 3kjf   | 2.00       | <i>Homo sapiens</i> | -4.634        |
| 22     | Ras           | 7jhp   | 2.77       | <i>Homo sapiens</i> | -4.323        |
| 23     | Casepase-9    | 1nw9   | 2.40       | <i>Homo sapiens</i> | -4.076        |
| 24     | STAT3         | 6nuq   | 3.15       | <i>Homo sapiens</i> | -3.788        |
| 25     | Wnt           | 6gbi   | 1.25       | <i>Homo sapiens</i> | -2.6          |

Table S2 The molecular docking scoring of compound **C8** and proteins

| Number | Target         | PDB ID | Resolution | Organisms           | Docking score |
|--------|----------------|--------|------------|---------------------|---------------|
| 1      | AKT            | 6hhf   | 2.90       | <i>Homo sapiens</i> | -8.359        |
| 2      | Cyclin E1      | 5l2w   | 2.80       | <i>Homo sapiens</i> | -8.033        |
| 3      | Cyclin A       | 6gue   | 1.99       | <i>Homo sapiens</i> | -7.643        |
| 4      | CDK6           | 3nux   | 2.70       | <i>Homo sapiens</i> | -7.536        |
| 5      | MEK            | 5eym   | 2.70       | <i>Homo sapiens</i> | -7.518        |
| 6      | Raf            | 5fd2   | 2.89       | <i>Homo sapiens</i> | -7.494        |
| 7      | JNK            | 4y5h   | 2.06       | <i>Homo sapiens</i> | -7.316        |
| 8      | CDK2           | 5nev   | 2.97       | <i>Homo sapiens</i> | -7.256        |
| 9      | BCI-xl         | 7lh7   | 1.41       | <i>Homo sapiens</i> | -7.255        |
| 10     | PARP           | 6bhv   | 2.30       | <i>Homo sapiens</i> | -7.239        |
| 11     | PI3K           | 6gvf   | 2.50       | <i>Homo sapiens</i> | -7.123        |
| 12     | mTOR           | 4jt6   | 3.60       | <i>Homo sapiens</i> | -6.931        |
| 13     | JAK            | 5tq6   | 2.06       | <i>Homo sapiens</i> | -6.84         |
| 14     | Cyclin D1      | 5vzu   | 2.70       | <i>Homo sapiens</i> | -6.639        |
| 15     | GSK-3 $\beta$  | 1pyx   | 2.40       | <i>Homo sapiens</i> | -6.185        |
| 16     | Caspase-3      | 3kjf   | 2.00       | <i>Homo sapiens</i> | -5.887        |
| 17     | CDK7           | 1ua2   | 3.02       | <i>Homo sapiens</i> | -5.501        |
| 18     | Bad            | 4ieh   | 2.10       | <i>Homo sapiens</i> | -5.211        |
| 19     | MAPK           | 6tca   | 3.70       | <i>Homo sapiens</i> | -5.107        |
| 20     | Bcl-2          | 6qgg   | 1.50       | <i>Homo sapiens</i> | -4.911        |
| 21     | Ras            | 7jhp   | 2.77       | <i>Homo sapiens</i> | -4.281        |
| 22     | Casepase-9     | 1nw9   | 2.40       | <i>Homo sapiens</i> | -3.995        |
| 23     | NF- $\kappa$ B | 5e6a   | 2.20       | <i>Homo sapiens</i> | -3.878        |
| 24     | STAT3          | 6nuq   | 3.15       | <i>Homo sapiens</i> | -3.648        |
| 25     | ERK            | 6hkn   | 2.33       | <i>Homo sapiens</i> | -3.131        |

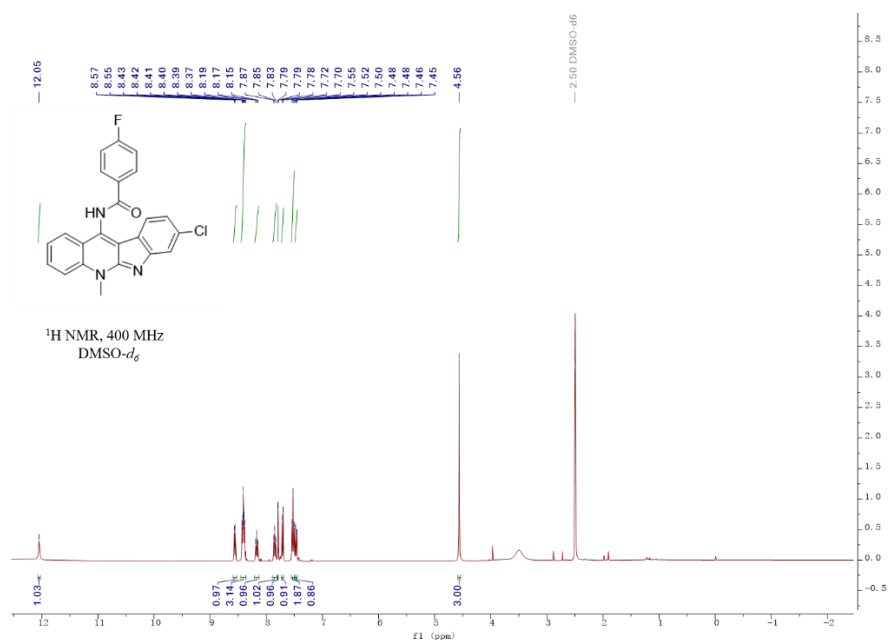

Figure S1. <sup>1</sup>H NMR spectra of compound **C5**

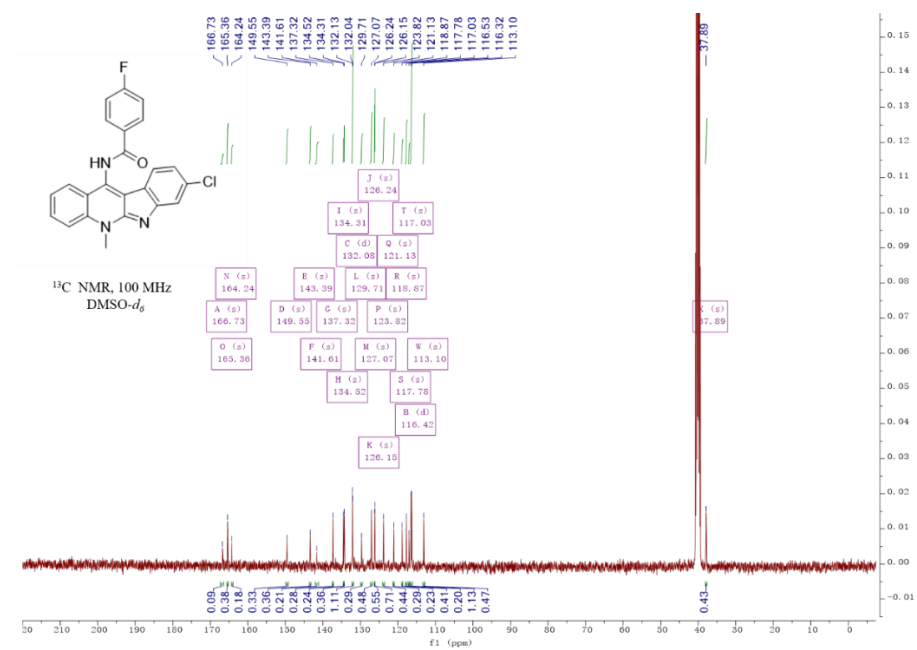

Figure S2. <sup>13</sup>C NMR spectra of compound C5

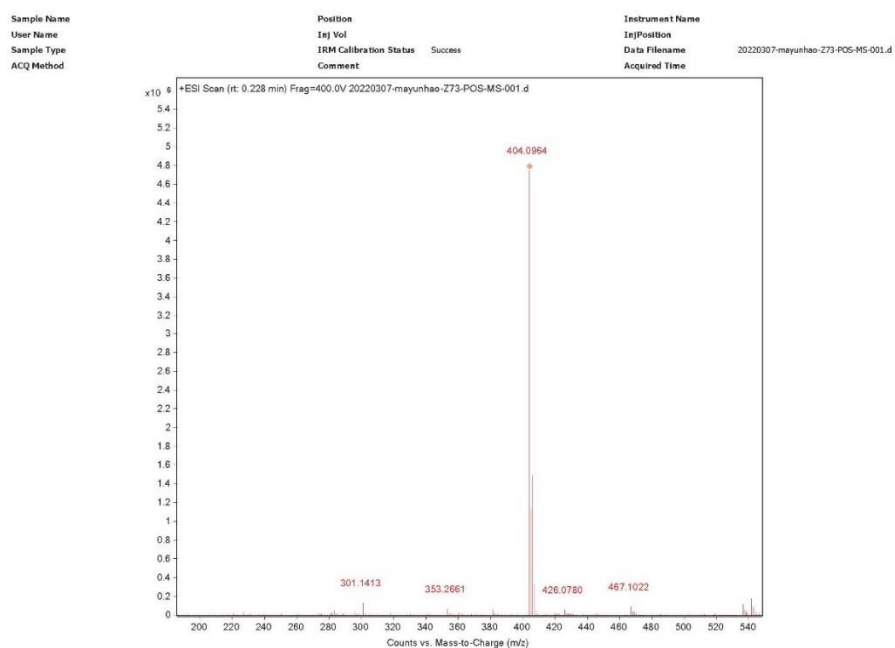

Figure S3. Mass spectrometry of compound **C5**



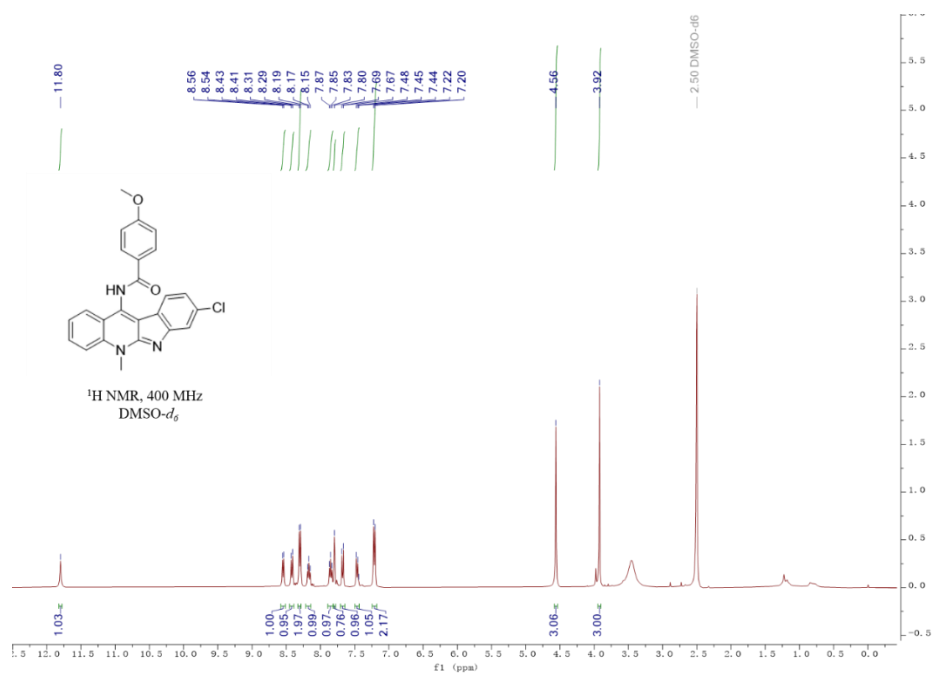

Figure S4. <sup>1</sup>H NMR spectra of compound **C8**

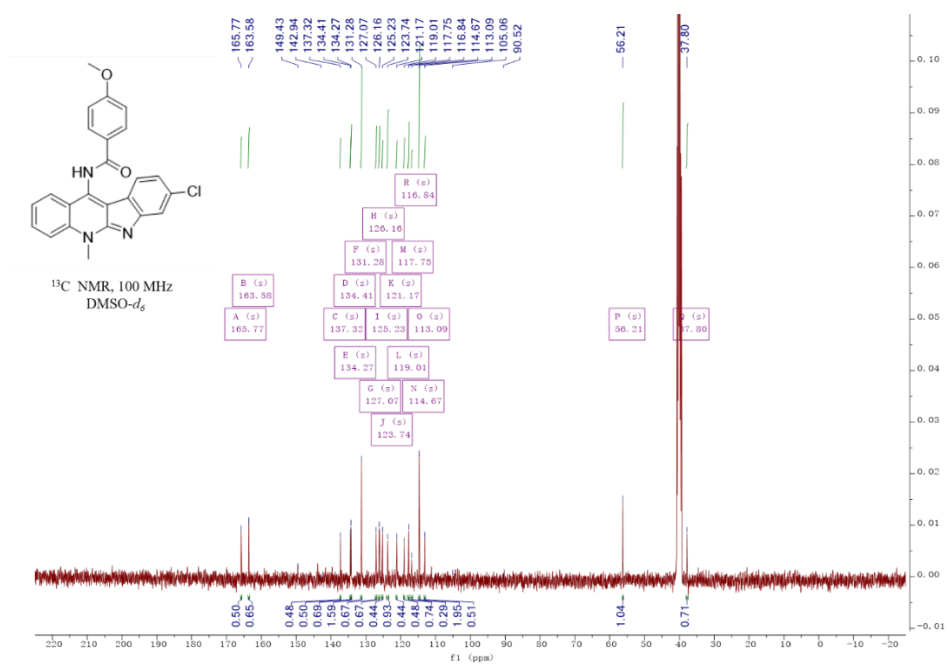

Figure S5. <sup>13</sup>C NMR spectra of compound C8

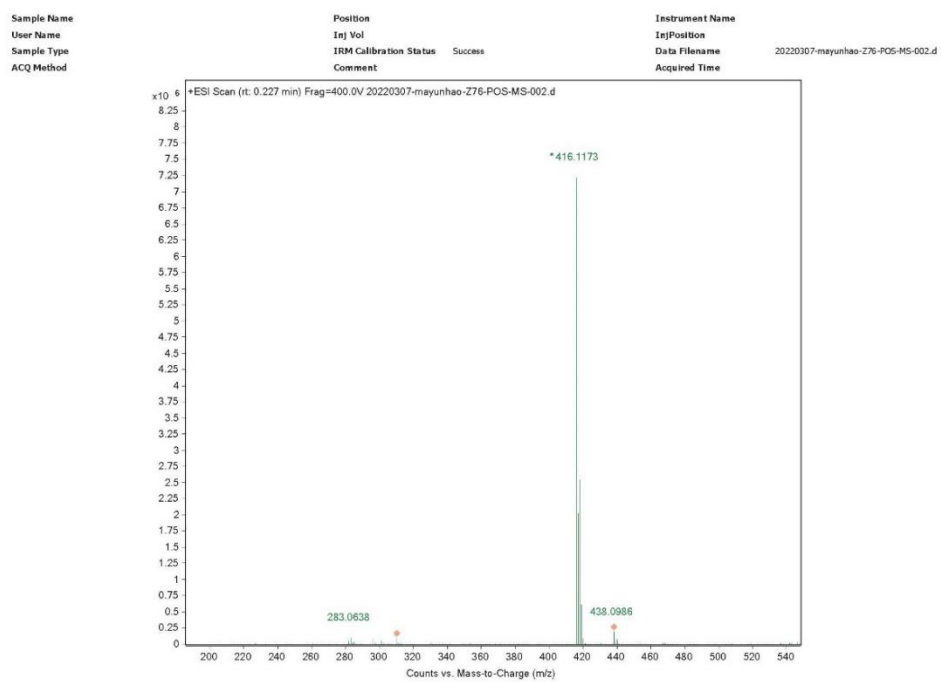

Figure S6. Mass spectrometry of compound **C8**

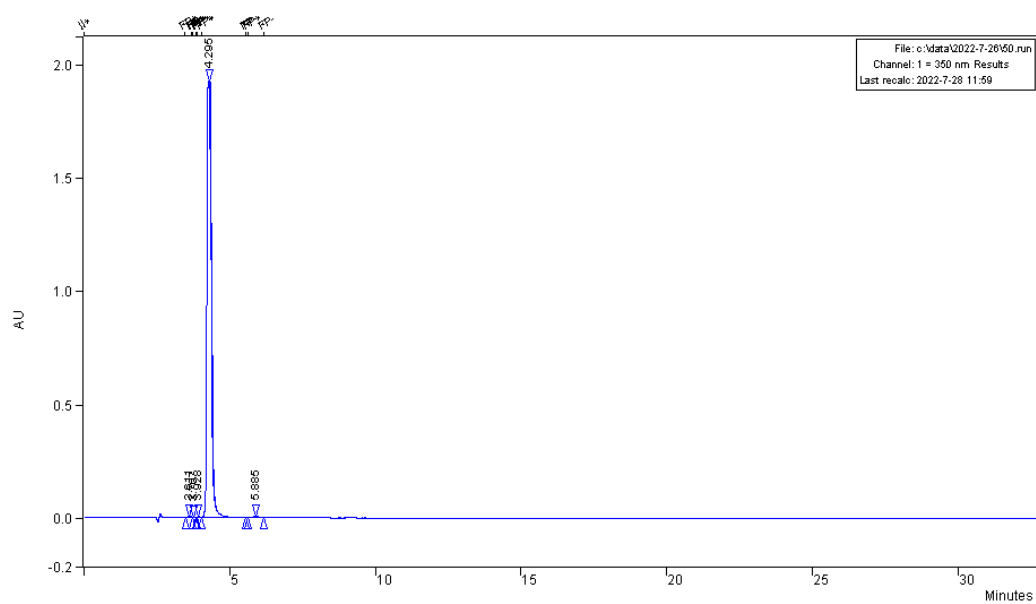

**Figure S7.** Purity test of compound **A1** by HPLC

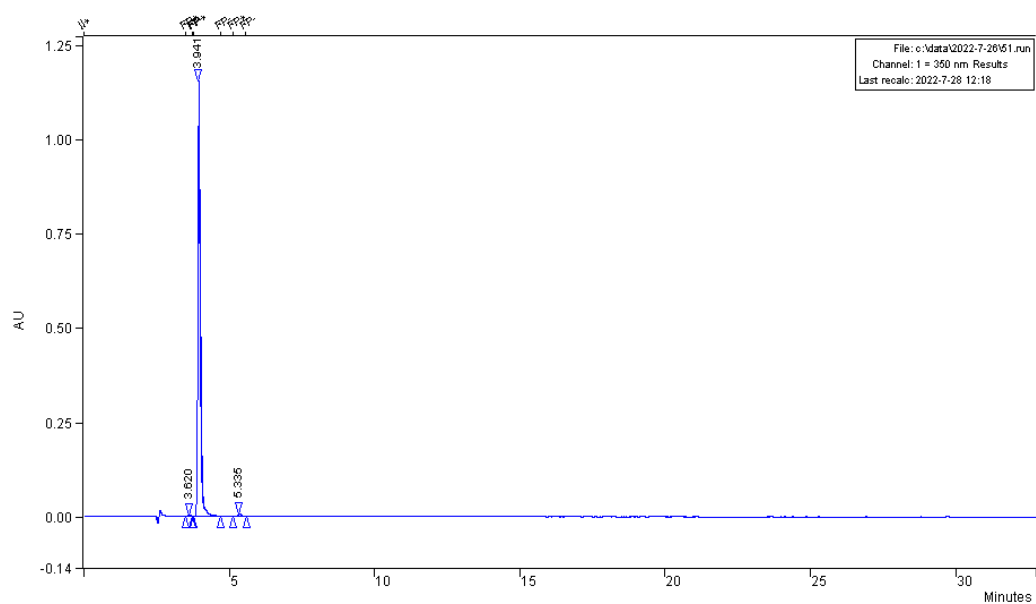

**Figure S8.** Purity test of compound **A2** by HPLC

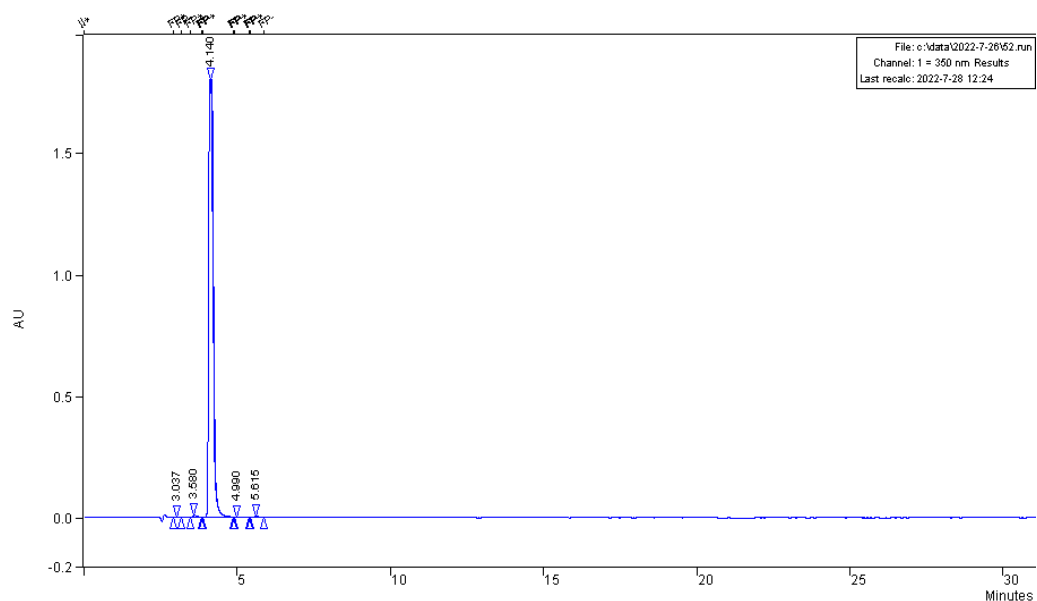

**Figure S9.** Purity test of compound **A3** by HPLC

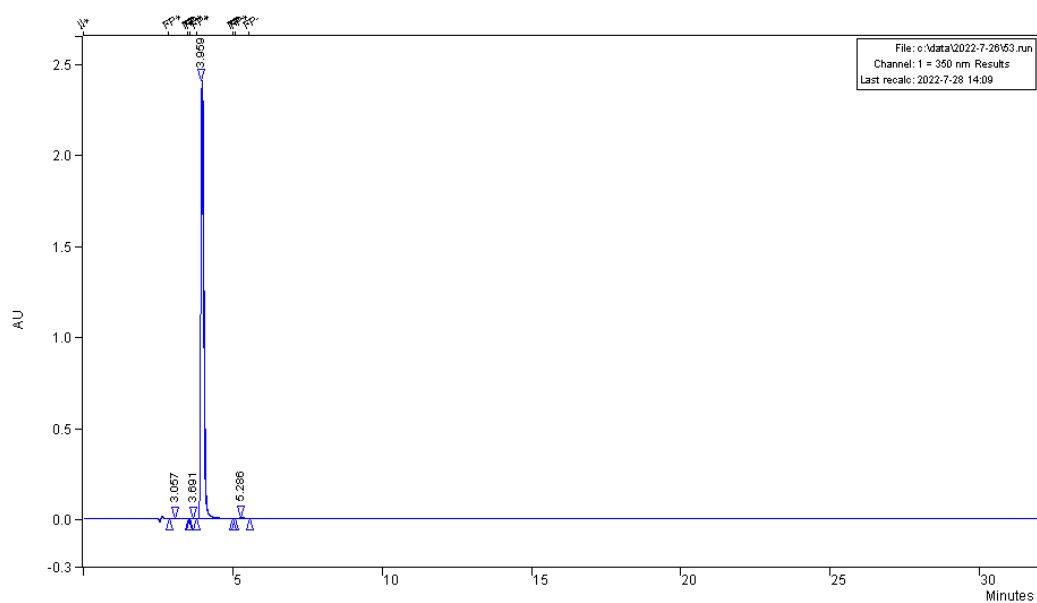

**Figure S10.** Purity test of compound **A4** by HPLC

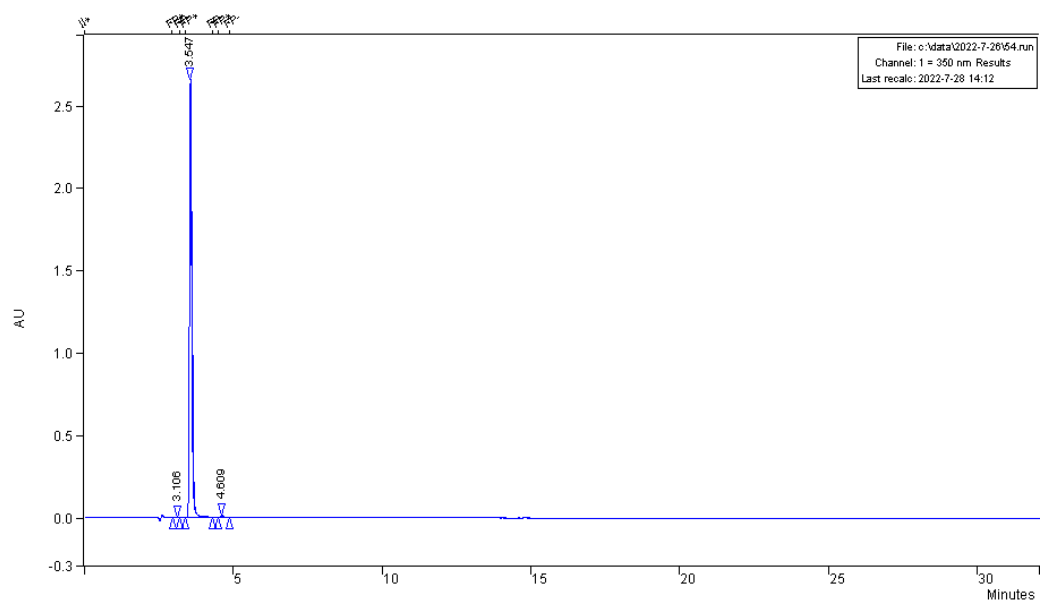

**Figure S11.** Purity test of compound **A5** by HPLC

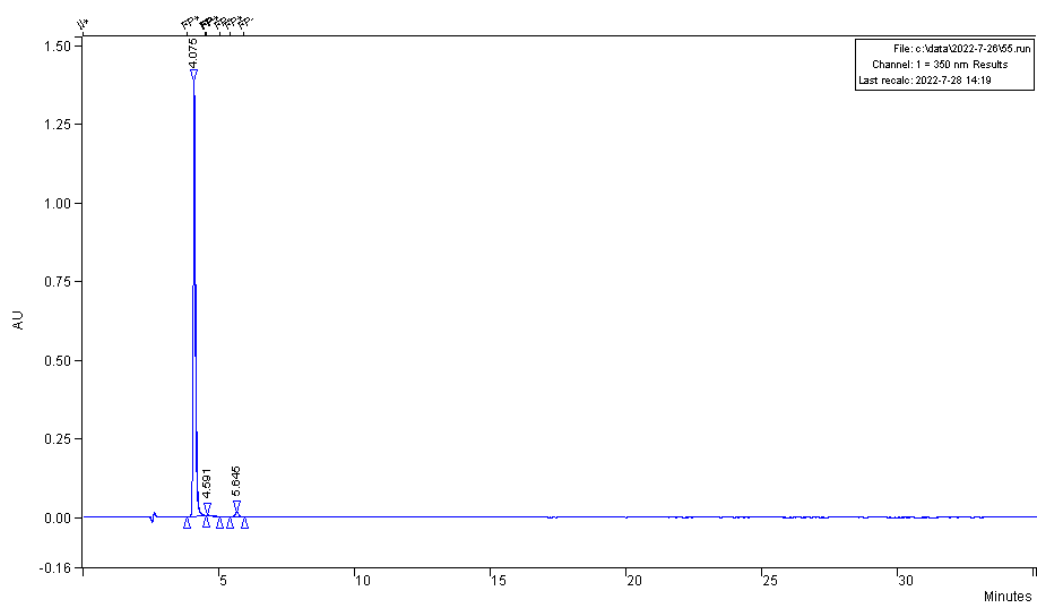

**Figure S12.** Purity test of compound **A6** by HPLC

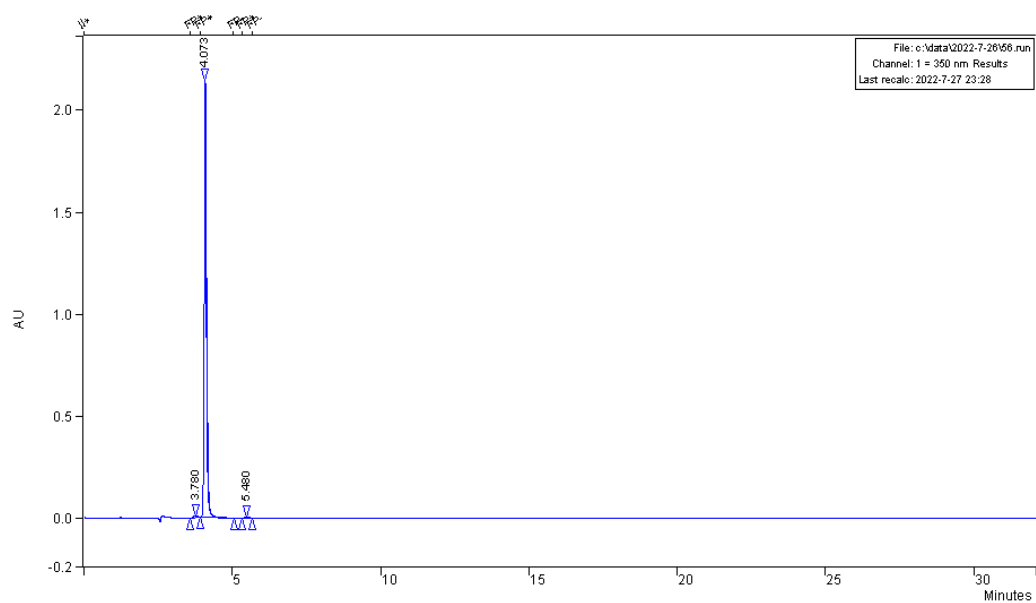

**Figure S13.** Purity test of compound **A7** by HPLC

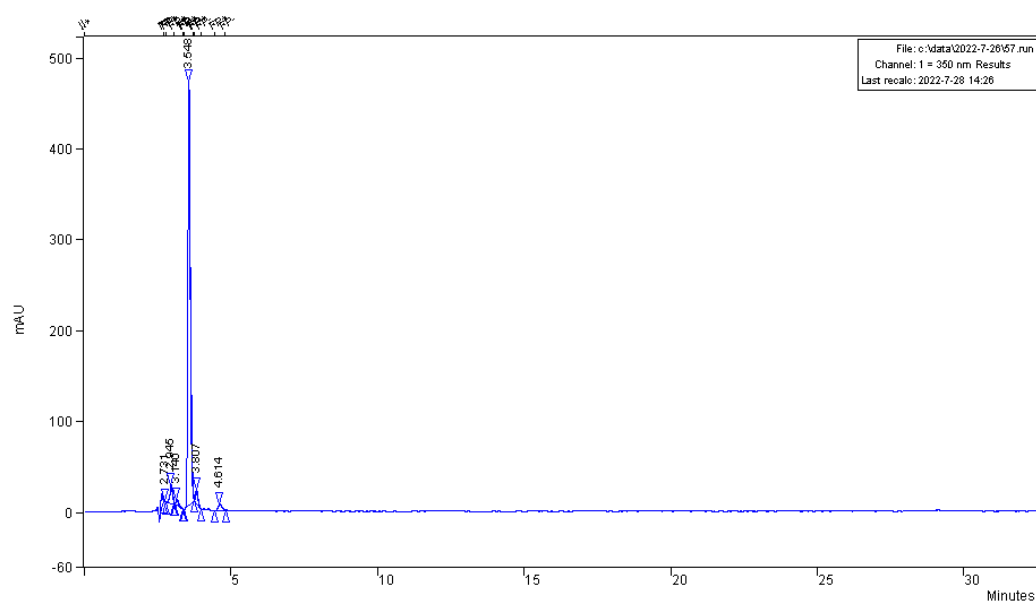

**Figure S14.** Purity test of compound **A8** by HPLC

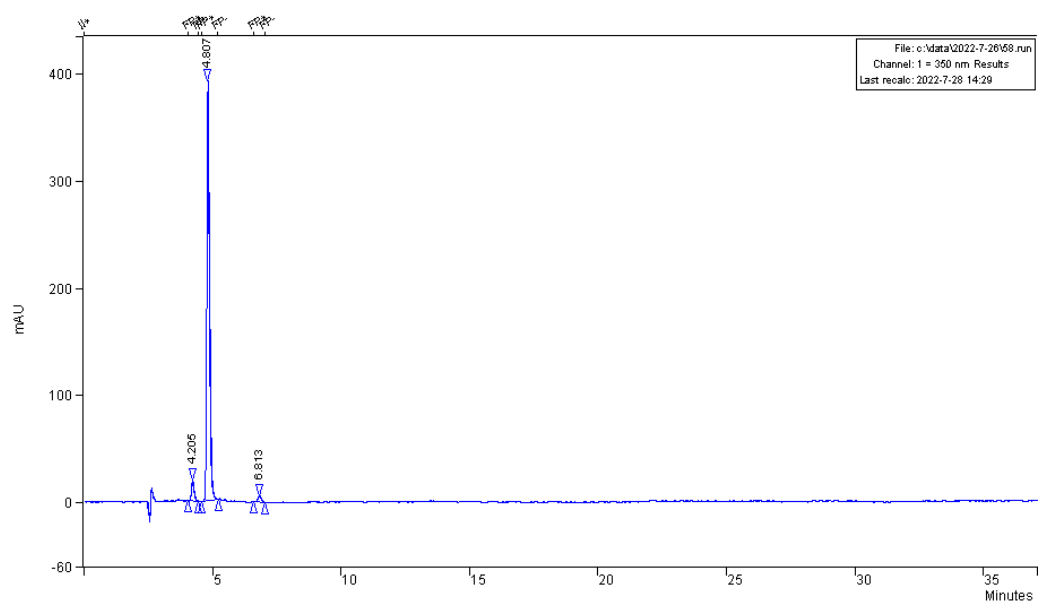

**Figure S15.** Purity test of compound **A9** by HPLC

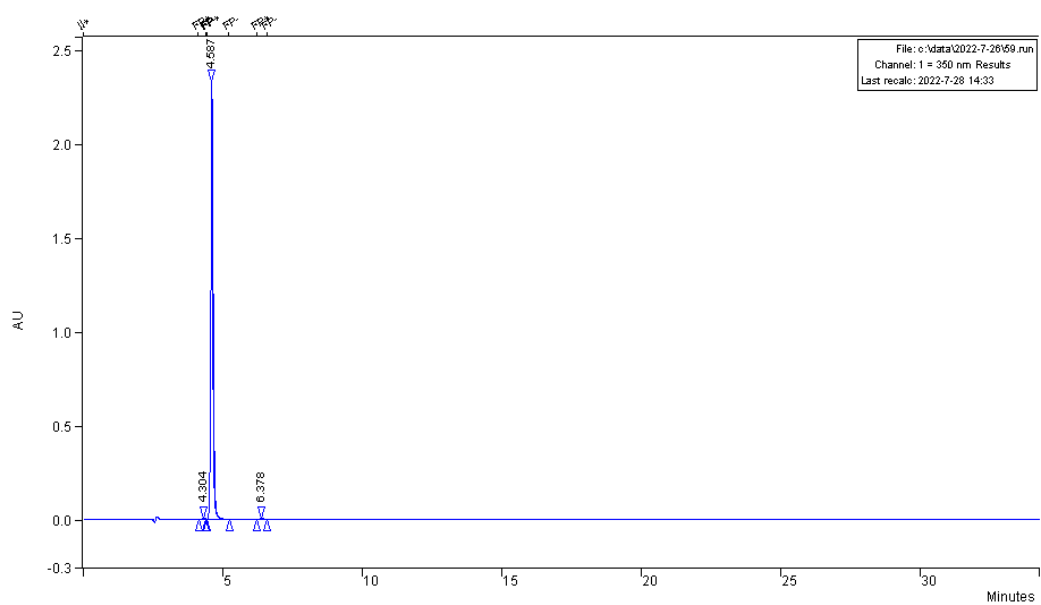

**Figure S16.** Purity test of compound **A10** by HPLC



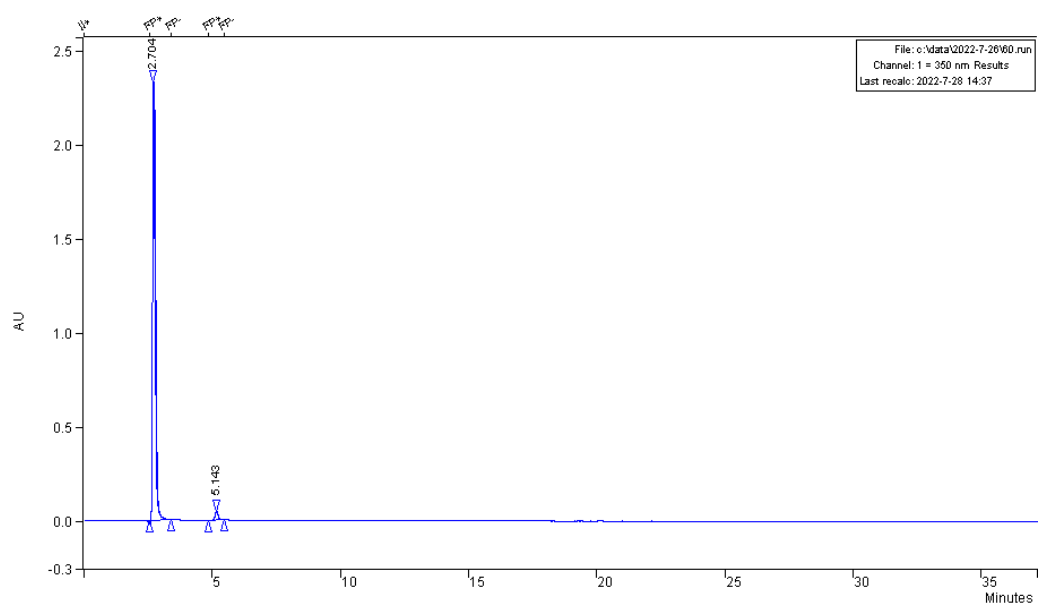

**Figure S17.** Purity test of compound **B1** by HPLC

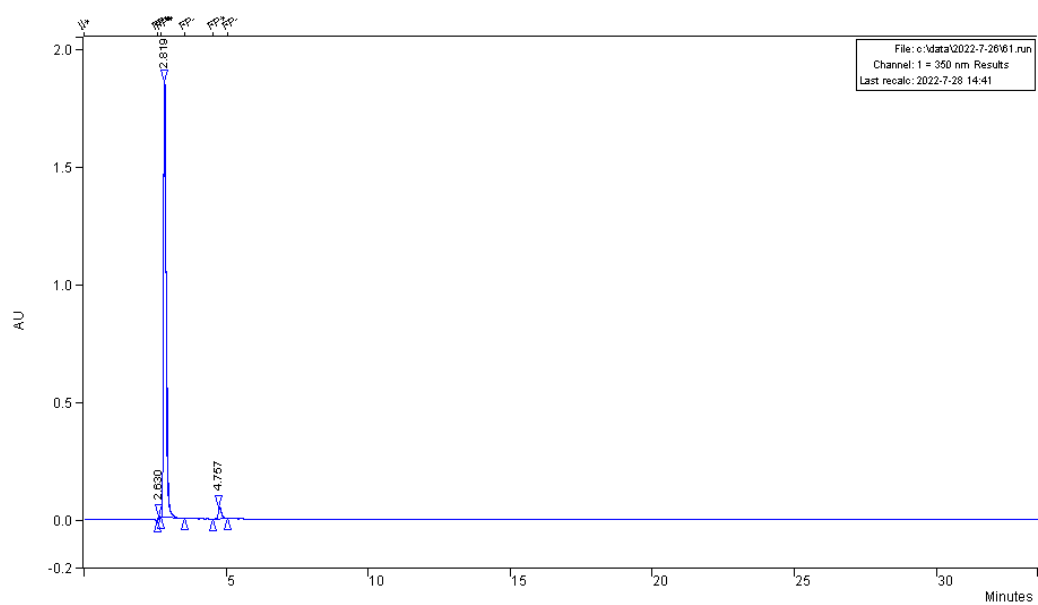

**Figure S18.** Purity test of compound **B2** by HPLC

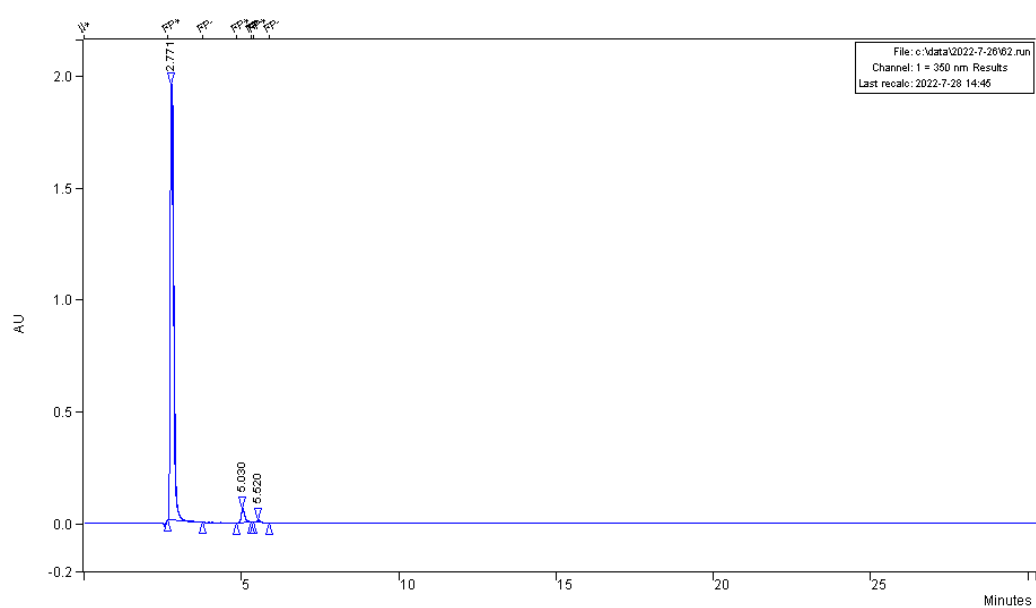

**Figure S19.** Purity test of compound **B3** by HPLC

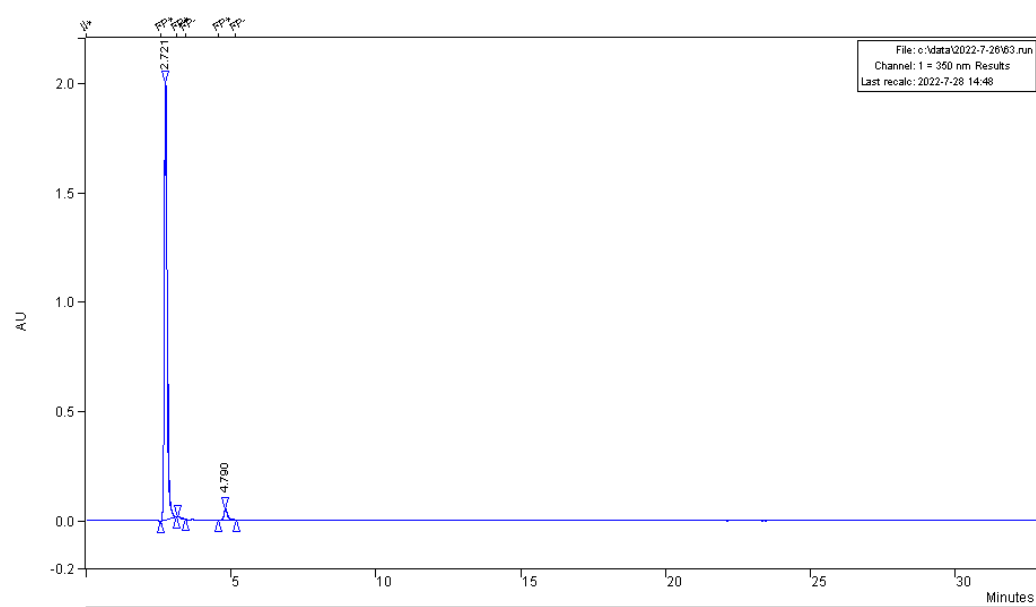

**Figure S20.** Purity test of compound **B4** by HPLC

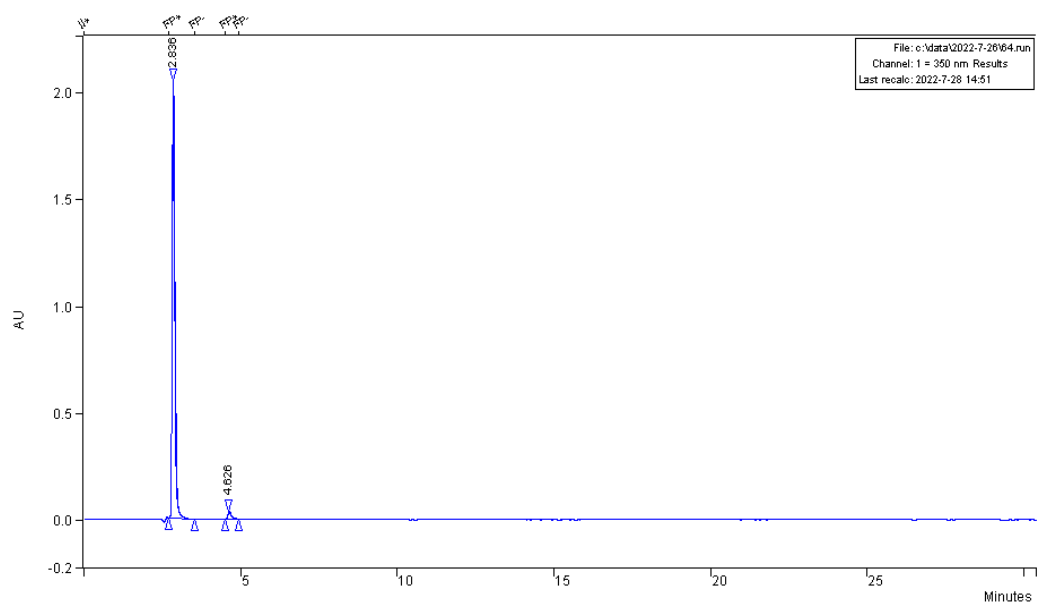

**Figure S21.** Purity test of compound **B5** by HPLC

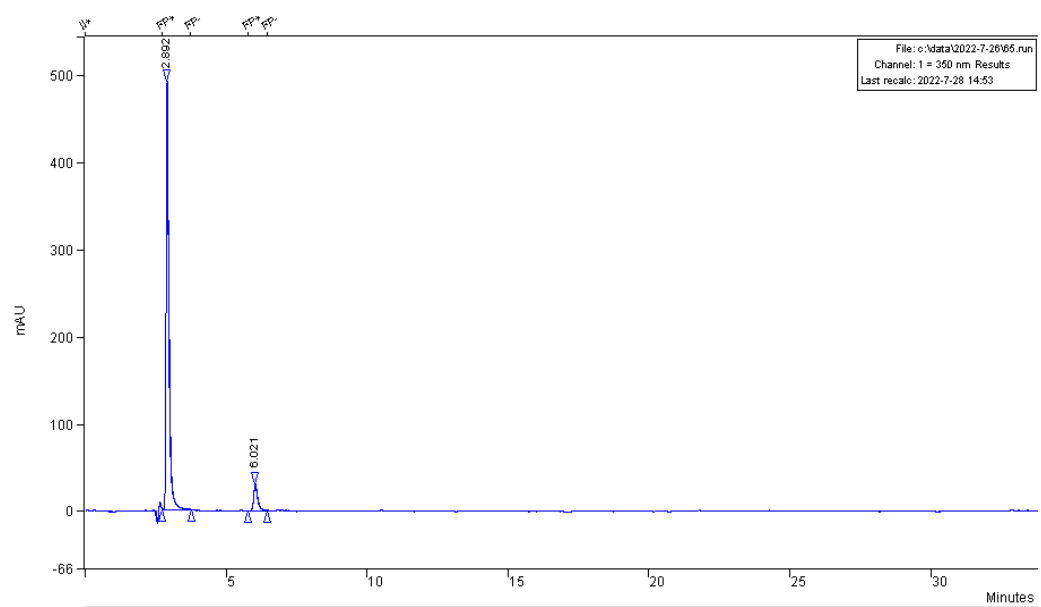

**Figure S22.** Purity test of compound **B6** by HPLC

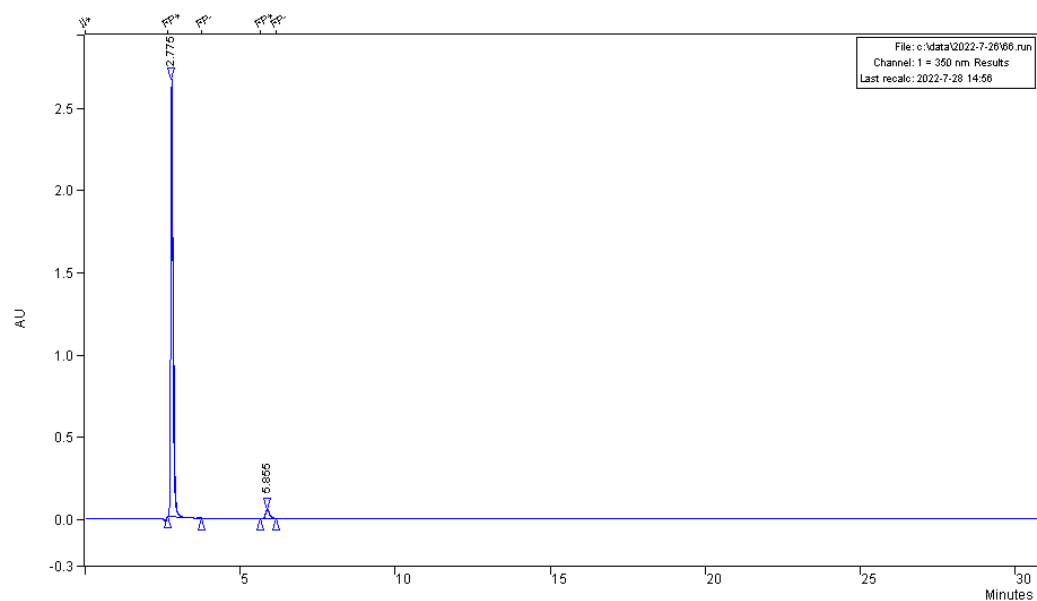

**Figure S23.** Purity test of compound **B7** by HPLC

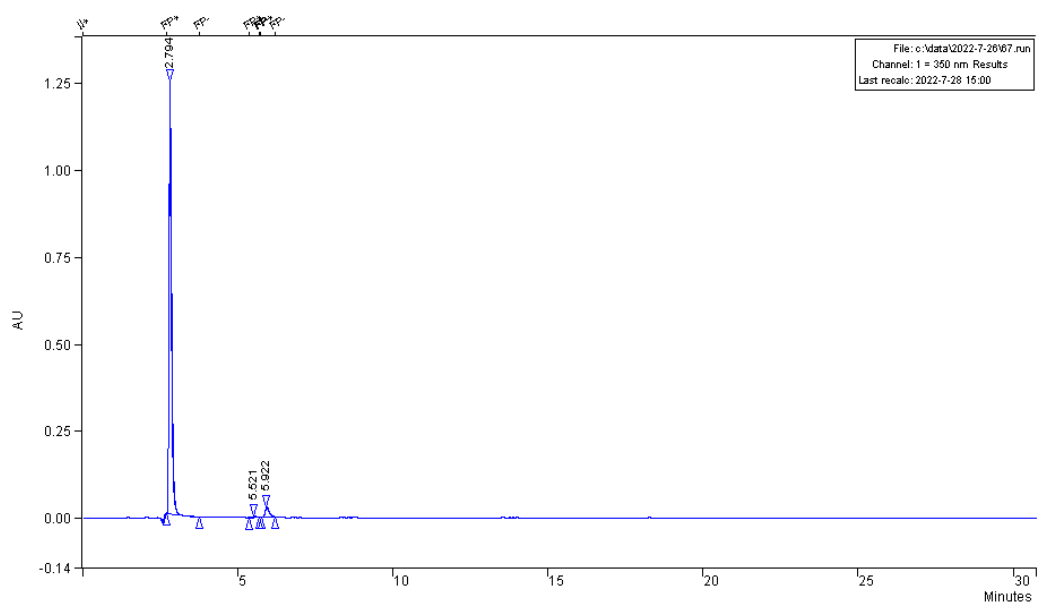

**Figure S24.** Purity test of compound **B8** by HPLC

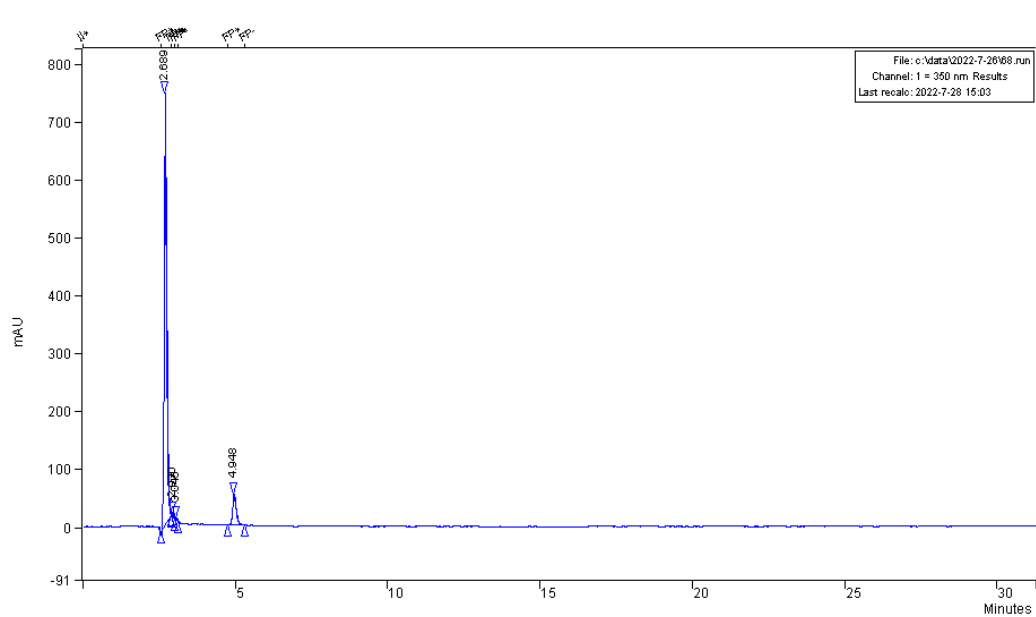

**Figure S25.** Purity test of compound **B9** by HPLC

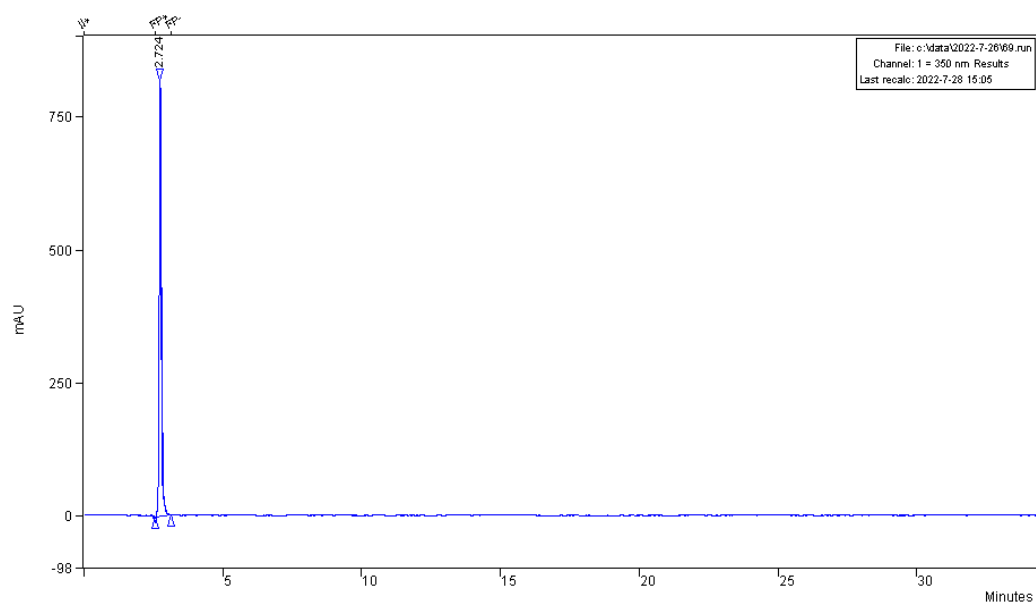

**Figure S26.** Purity test of compound **C1** by HPLC

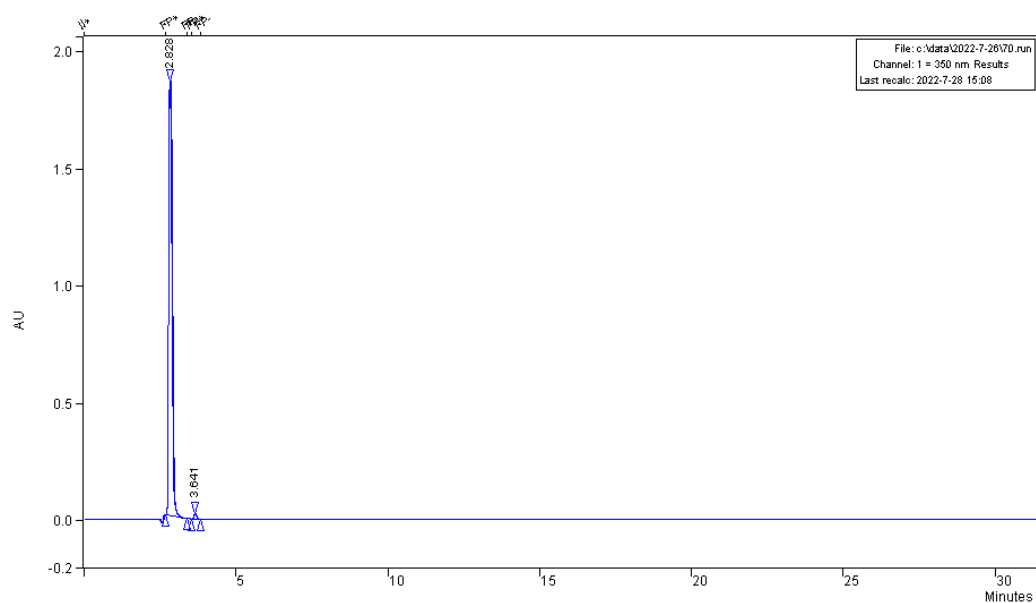

**Figure S27.** Purity test of compound **C2** by HPLC

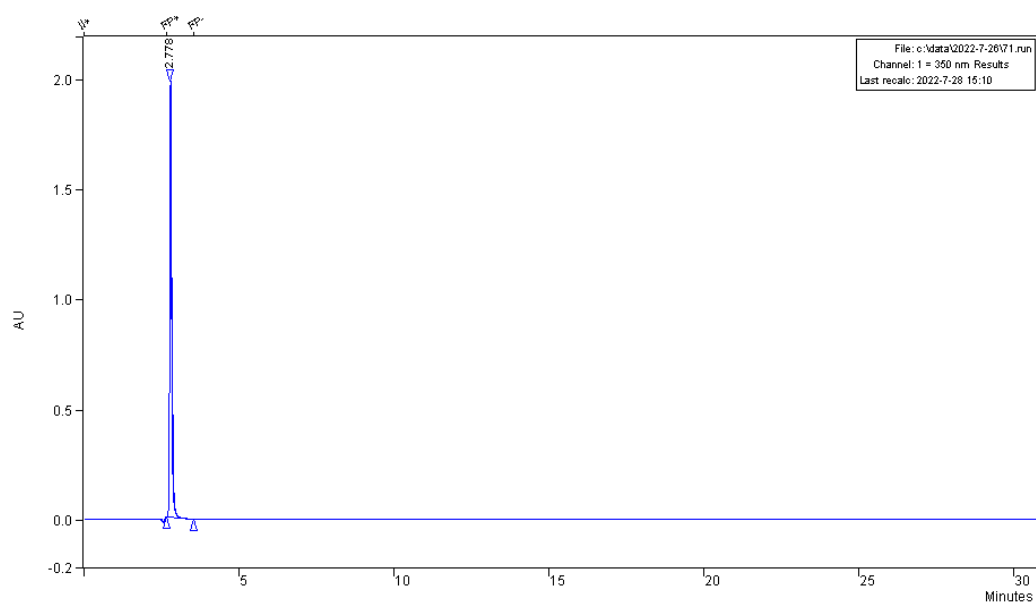

**Figure S28.** Purity test of compound **C3** by HPLC

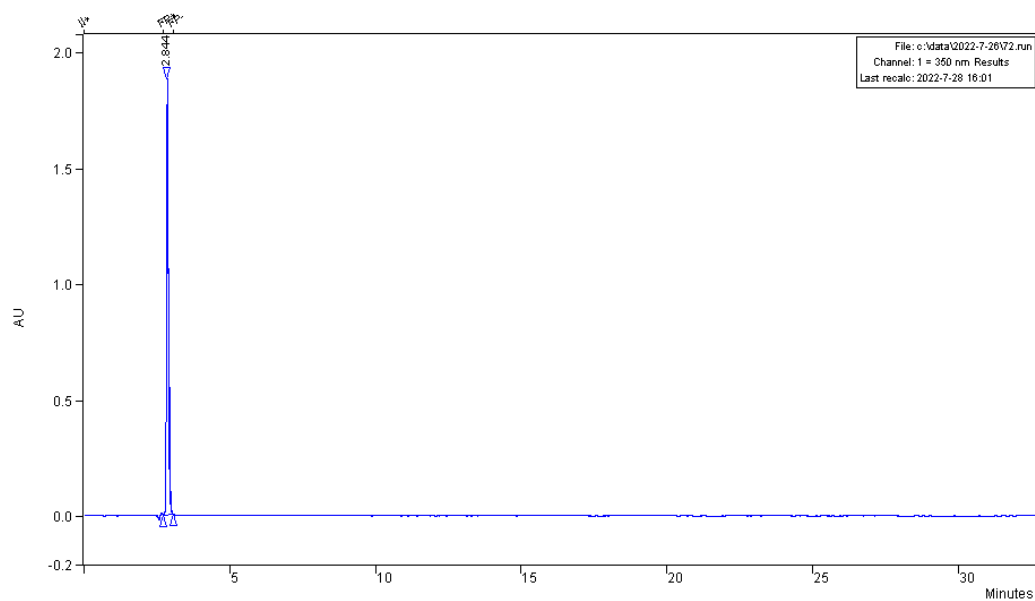

**Figure S29.** Purity test of compound **C4** by HPLC

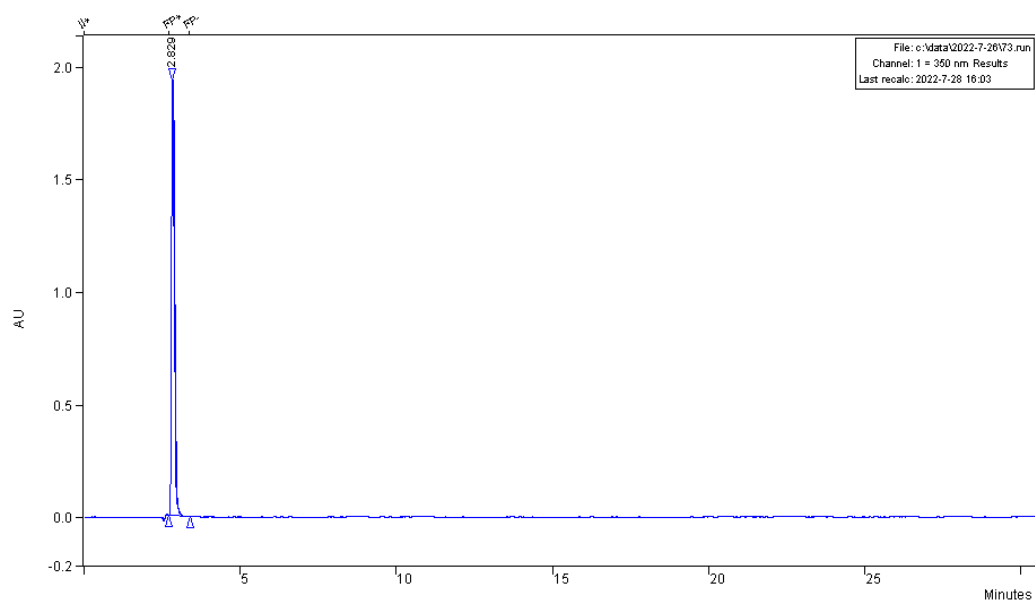

**Figure S30.** Purity test of compound **C5** by HPLC

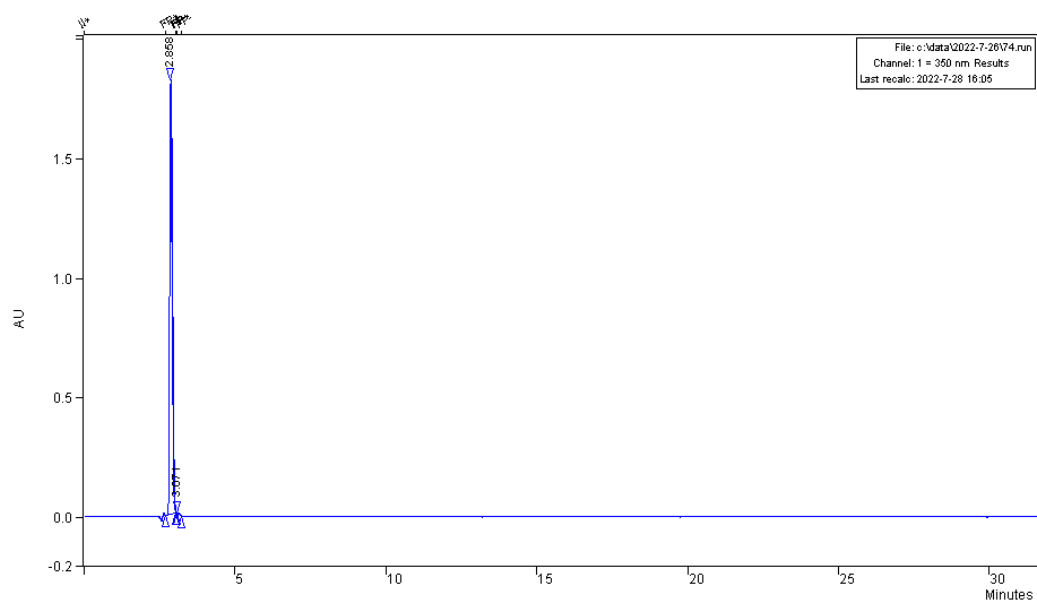

**Figure S31.** Purity test of compound **C6** by HPLC

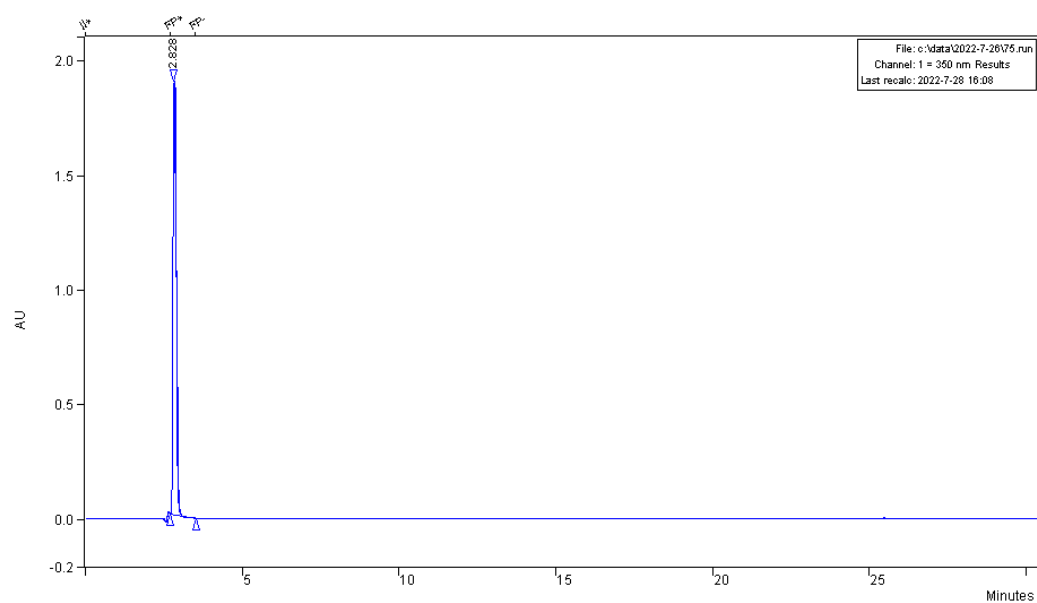

**Figure S32.** Purity test of compound **C7** by HPLC



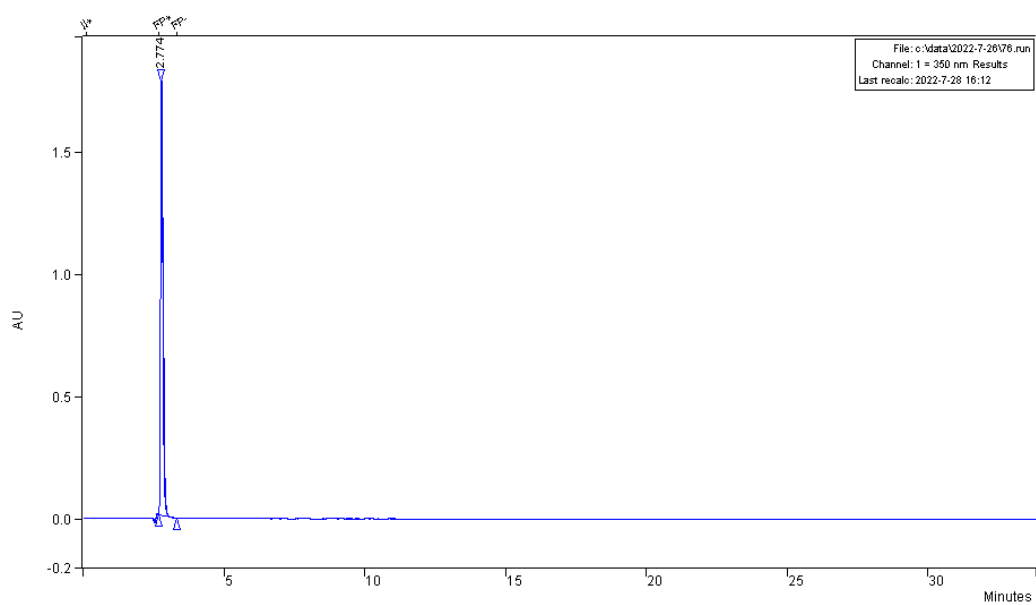

**Figure S33.** Purity test of compound **C8** by HPLC

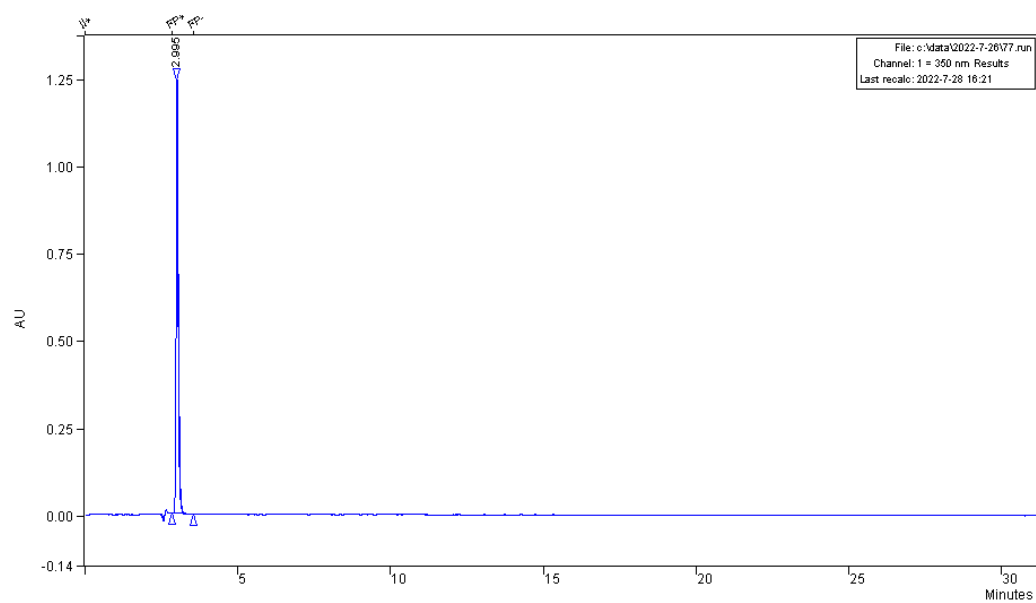

**Figure S34.** Purity test of compound **C9** by HPLC

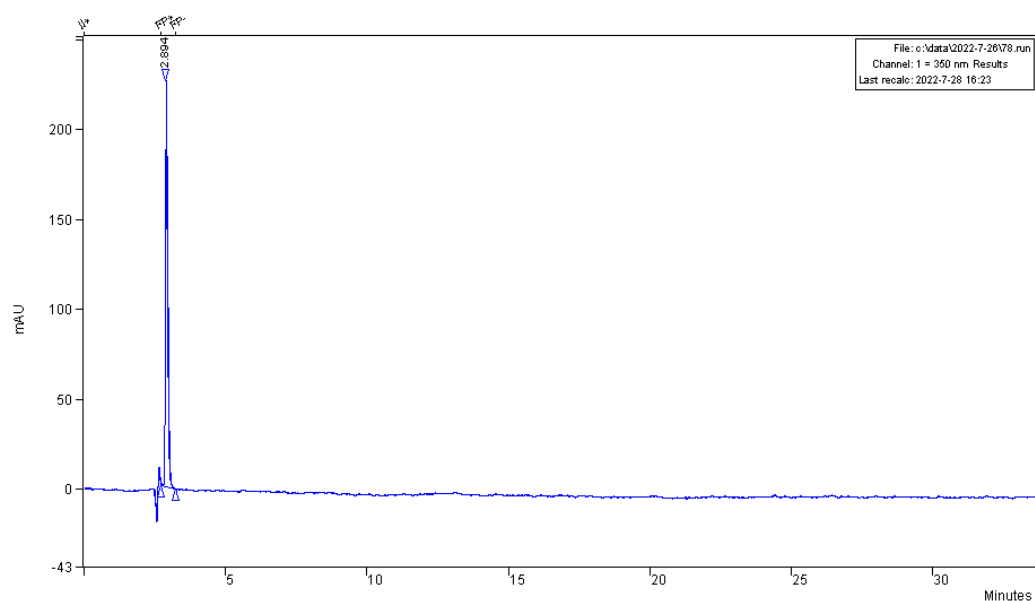

**Figure S35.** Purity test of compound **C10** by HPLC

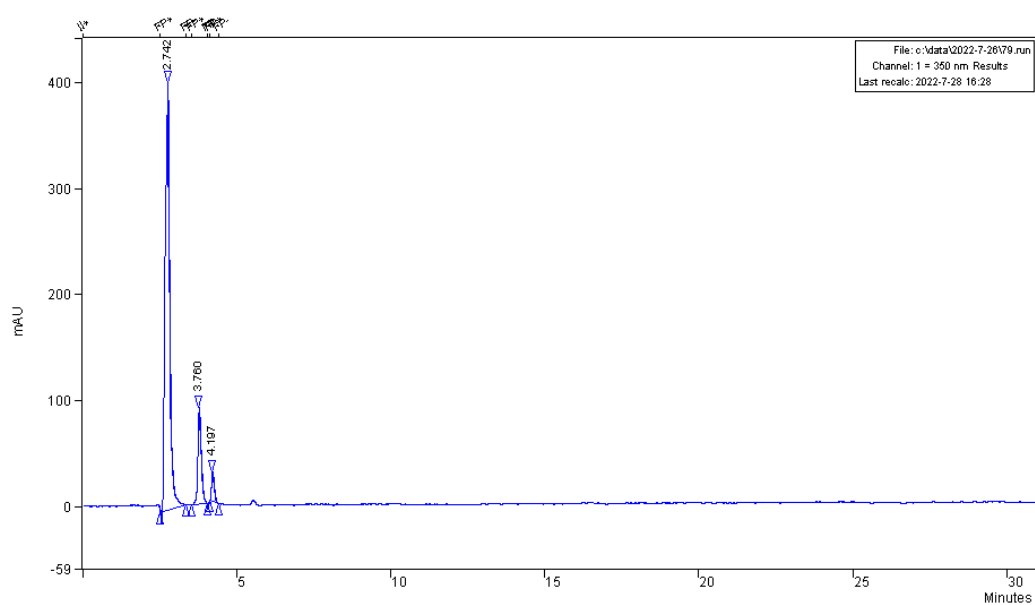

**Figure S36.** Purity test of compound **D1** by HPLC

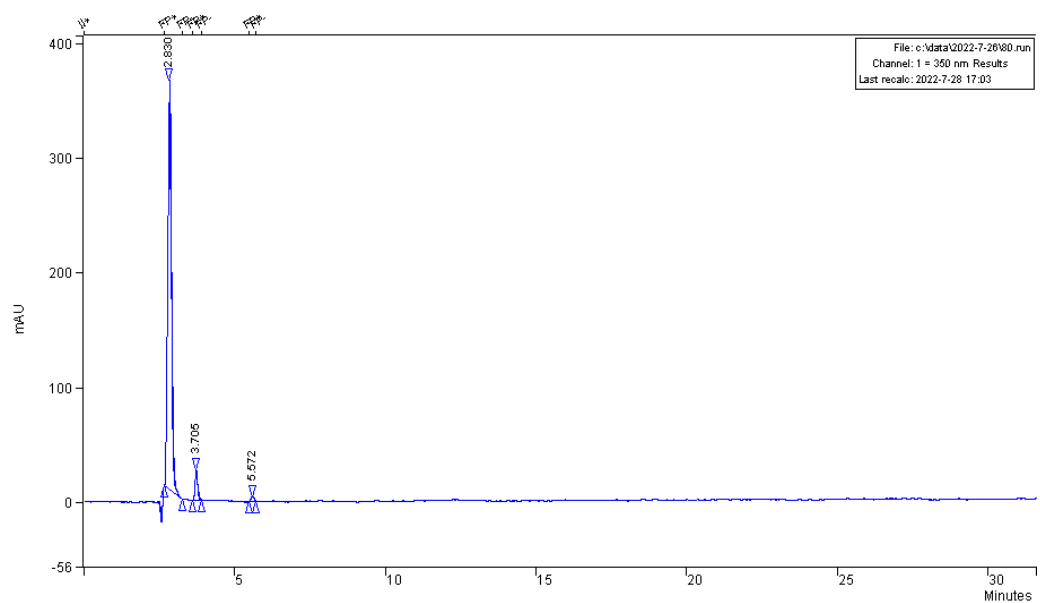

**Figure S37.** Purity test of compound **D2** by HPLC

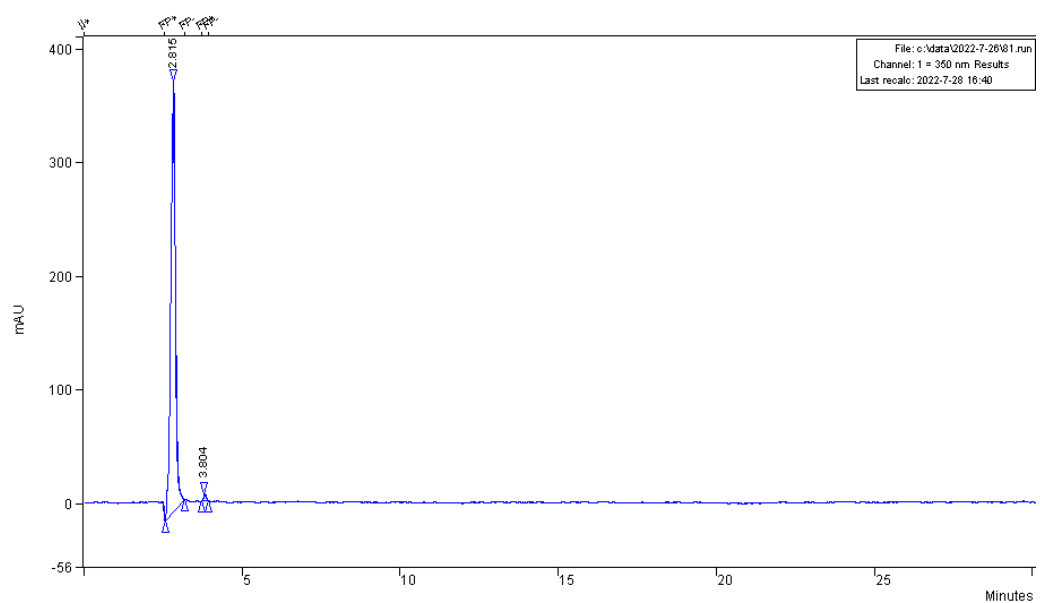

**Figure S38.** Purity test of compound **D3** by HPLC

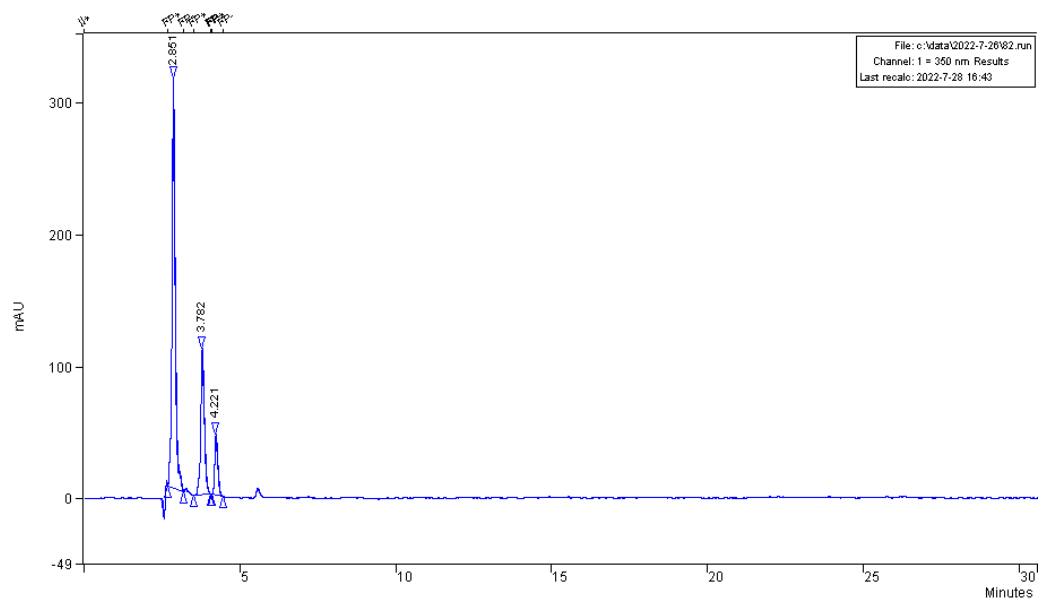

**Figure S39.** Purity test of compound **D4** by HPLC

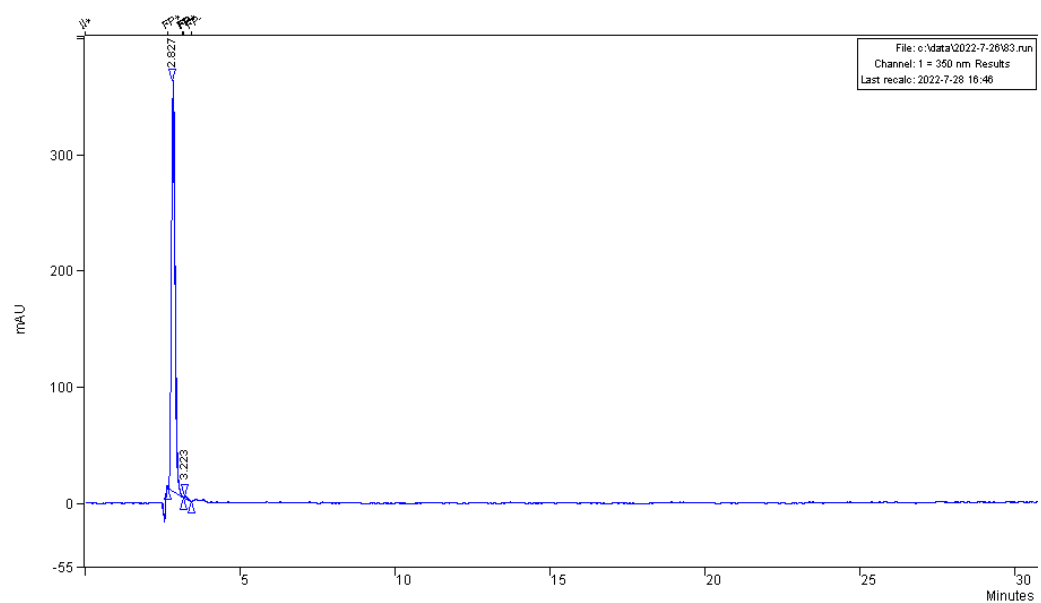

**Figure S40.** Purity test of compound **D5** by HPLC

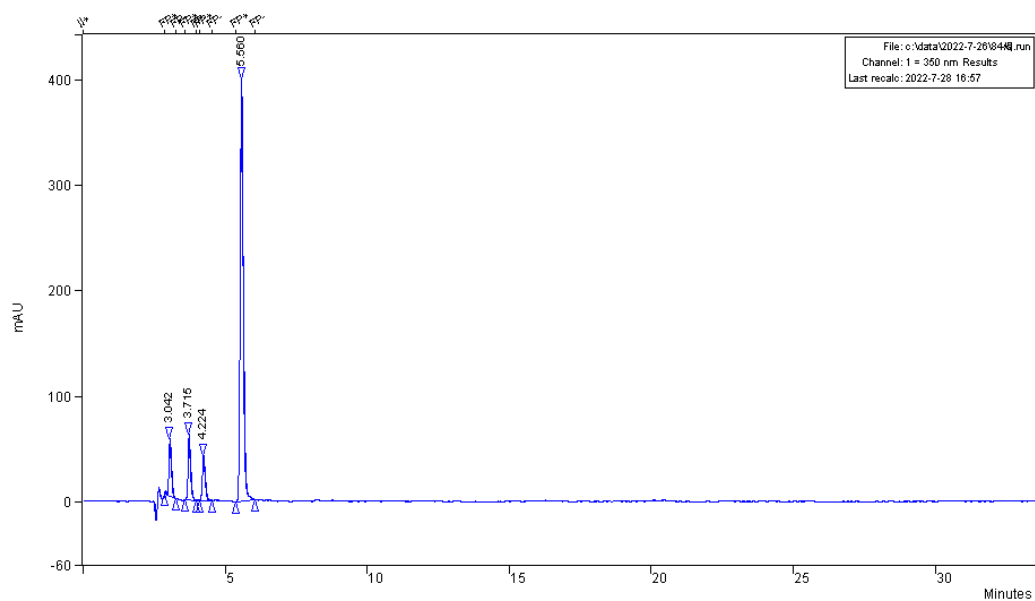

**Figure S41.** Purity test of compound **D6** by HPLC

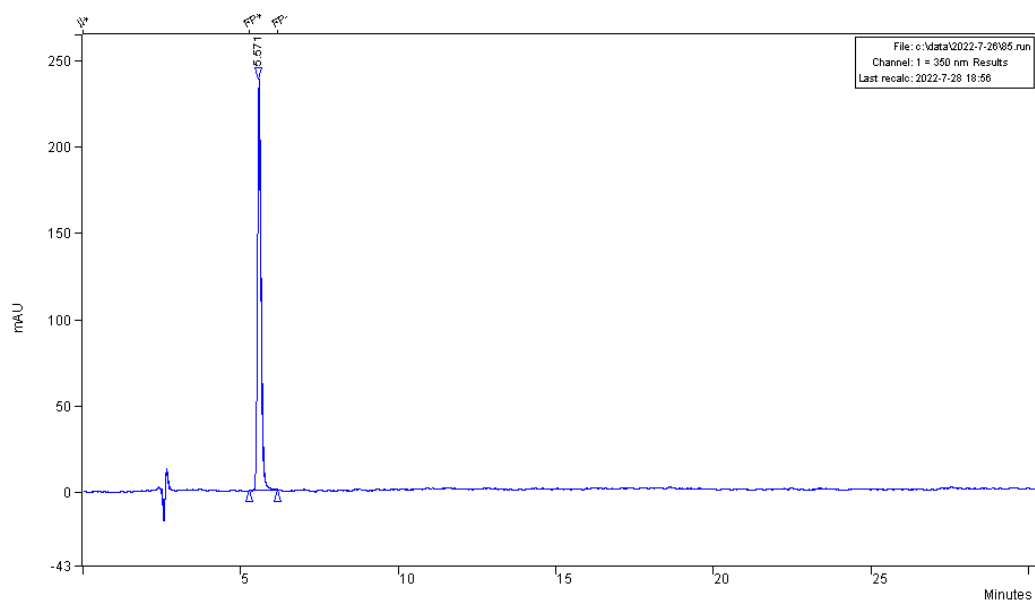

**Figure S42.** Purity test of compound **E1** by HPLC
